# Supplementary material
Source: PubMed Central journal article supplement (PMC8544754)
Supplement: NIHMS1709727-supplement-1.pdf [file NIHMS1709727-supplement-1.pdf]

**Author Contribution Form**

All manuscripts submitted to the *Journal of Geriatric Oncology* must be accompanied by this form. It is the responsibility of the corresponding author to complete the information in the form on behalf of the author team, sign it and transmit it to the Editorial Office via EES with the manuscript.

**Manuscript Title:**

..... **Association of Guideline-Concordant Initial Systemic Treatment with Clinical and Economic Outcomes Among Elderly Women with Metastatic Breast Cancer in the United States**

.....

**Authorship Contributions**

The *Journal of Geriatric Oncology* adheres to the guidelines adopted by the International Committee of Medical Journal Editors ("Uniform requirements for manuscripts submitted to biomedical journals", available from <http://www.icmje.org>). According to the guidelines, authorship should be based on: 1) substantial contributions to conception and design, acquisition of data, or analysis and interpretation of data; 2) drafting the article or revising it critically for important intellectual content; and 3) final approval of the version to be published.

Please indicate the contribution of each author to the following areas:

| <i>Contribution</i>                    | <i>Name(s) of author(s)</i>                  |
|----------------------------------------|----------------------------------------------|
| Study concepts                         | Vyas, Kogut, Mantaian, Kamat, Kurian.....    |
| Study design                           | Vyas, Kogut, Mantaian, Kamat, Kurian.....    |
| Data acquisition                       | ...Vyas.....                                 |
| Quality control of data and algorithms | ...Vyas, Mantaian.....                       |
| Data analysis and interpretation       | ...Vyas, Mantaian, Kogut, Kamat, Kurian..... |
| Statistical analysis                   | ...Vyas, Kogut, Mantaian.....                |
| Manuscript preparation                 | ...Vyas, Kamat.....                          |
| Manuscript editing                     | ...Vyas, Kogut, Mantaian, Kamat, Kurian..... |
| Manuscript review                      | Vyas, Kogut, Mantaian, Kamat, Kurian .....   |

**Corresponding Author Declaration**

I confirm that all authors have made a significant contribution to this manuscript, have seen and approved the final manuscript, and agree to its submission to the *Journal of Geriatric Oncology*.

Corresponding Author Name: .....Ami Vyas.....

Corresponding Author Signature: .....  .....

Date: .....2/4/2021.....
