# Supplementary material
Source: PubMed Central journal article supplement (PMC8544754)
Supplement: NIHMS1709727-supplement-2.pdf [file NIHMS1709727-supplement-2.pdf]

---

 Supplemental Table 1: Treatment Algorithms used to Identify Guideline-Concordant Initial Treatment as per the NCCN Guidelines for Metastatic Breast Cancer by Tumor Status
 

---

|               |                                                                                                                                                                                                                                  |                                                                                                                                                                                                                                                                                                                                                                                                                                                                                           |
|---------------|----------------------------------------------------------------------------------------------------------------------------------------------------------------------------------------------------------------------------------|-------------------------------------------------------------------------------------------------------------------------------------------------------------------------------------------------------------------------------------------------------------------------------------------------------------------------------------------------------------------------------------------------------------------------------------------------------------------------------------------|
| HER2-<br>/HR- | a Chemotherapy                                                                                                                                                                                                                   | <ul style="list-style-type: none"> <li>• Anthracyclines (Doxorubicin, Epirubicin, OR Pegylated liposomal doxorubicin) OR</li> <li>• Taxanes (Paclitaxel, Docetaxel, OR Albumin-bound paclitaxel) OR</li> <li>• Antimetabolites (Capecitabine OR Gemcitabine) OR</li> <li>• Other microtubule inhibitors (Vinorelbine OR Eribulin) OR</li> <li>• Other agents (Cyclophosphamide, Carboplatin, Mitoxantrone, Cisplatin, Etoposide, Vinblastine, Fluorouracil CI, OR Ixabepilone)</li> </ul> |
| HER2-<br>/HR+ | a Aromatase inhibitors (Anastrozole OR Letrozole OR Exemestane) OR<br>b Selective endocrine receptor modulators (Tamoxifen OR Toremifene) OR<br>c Selective endocrine receptor down-regulator (Fulvestrant) OR<br>d Chemotherapy | <ul style="list-style-type: none"> <li>• Anthracyclines (Doxorubicin, Epirubicin, OR Pegylated liposomal doxorubicin) OR</li> <li>• Taxanes (Paclitaxel, Docetaxel, OR Albumin-bound paclitaxel) OR</li> <li>• Antimetabolites (Capecitabine OR Gemcitabine) OR</li> <li>• Other microtubule inhibitors (Vinorelbine OR Eribulin) OR</li> <li>• Other agents (Cyclophosphamide, Carboplatin, Mitoxantrone, Cisplatin, Etoposide, Vinblastine, Fluorouracil CI, OR Ixabepilone)</li> </ul> |
| HER2+/<br>HR- | a (HER2 targeted therapy + Chemotherapy) OR                                                                                                                                                                                      | <ul style="list-style-type: none"> <li>• Trastuzumab + Taxane (Docetaxel or Paclitaxel) OR</li> <li>• Pertuzumab + Trastuzumab + Taxane (Docetaxel or Paclitaxel) OR</li> <li>• Trastuzumab + Chemotherapy* OR</li> <li>• Other first-line therapies ((Trastuzumab + Paclitaxel ± Carboplatin) OR (Trastuzumab + Vinorelbine) OR (Trastuzumab + Capecitabine))</li> </ul>                                                                                                                 |
|               | b Trastuzumab only                                                                                                                                                                                                               |                                                                                                                                                                                                                                                                                                                                                                                                                                                                                           |

---

---

|               |   |                                                                                              |                                                                                                                                                                                                                                                                                                                                                                               |
|---------------|---|----------------------------------------------------------------------------------------------|-------------------------------------------------------------------------------------------------------------------------------------------------------------------------------------------------------------------------------------------------------------------------------------------------------------------------------------------------------------------------------|
| HER2+/<br>HR+ | a | Aromatase inhibitors (Anastrozole<br>OR Letrozole OR Exemestane) OR                          |                                                                                                                                                                                                                                                                                                                                                                               |
|               | b | Selective endocrine receptor<br>modulators (Tamoxifen OR<br>Toremifene) OR                   |                                                                                                                                                                                                                                                                                                                                                                               |
|               | c | Selective endocrine receptor down-<br>regulator (Fulvestrant) OR                             |                                                                                                                                                                                                                                                                                                                                                                               |
|               | d | Other endocrine therapy (Megestrol<br>acetate OR Fluoxymesterone OR<br>Ethniyl estradiol) OR |                                                                                                                                                                                                                                                                                                                                                                               |
|               | e | Trastuzumab only OR                                                                          |                                                                                                                                                                                                                                                                                                                                                                               |
|               | f | (HER2 targeted therapy +<br>Chemotherapy)                                                    | <ul style="list-style-type: none"><li>• Trastuzumab + Taxane (Docetaxel or<br/>Paclitaxel) OR</li><li>• Pertuzumab + Trastuzumab + Taxane<br/>(Docetaxel or Paclitaxel) OR</li><li>• Trastuzumab + Chemotherapy* OR</li><li>• Other therapies ((Trastuzumab +<br/>Paclitaxel + Carboplatin) OR<br/>(Trastuzumab + Vinorelbine) OR<br/>(Trastuzumab + Capecitabine))</li></ul> |

---

\*Included chemotherapy claims for doxorubicin, gemcitabine, cyclophosphamide, fluorouracil  
HER2: Human Epidermal Growth Factor Receptor 2; HR: Hormone Receptor
